# Supplementary material for: Cleveland Clinic Foundation Internal Medicine Residency Program
Source: Oxford University Press journal article supplement (doi:10.2337/cd19-0029), 2020-02-29

SUPPLEMENTARY DATA

Supplementary Figure 1. Fishbone Diagram

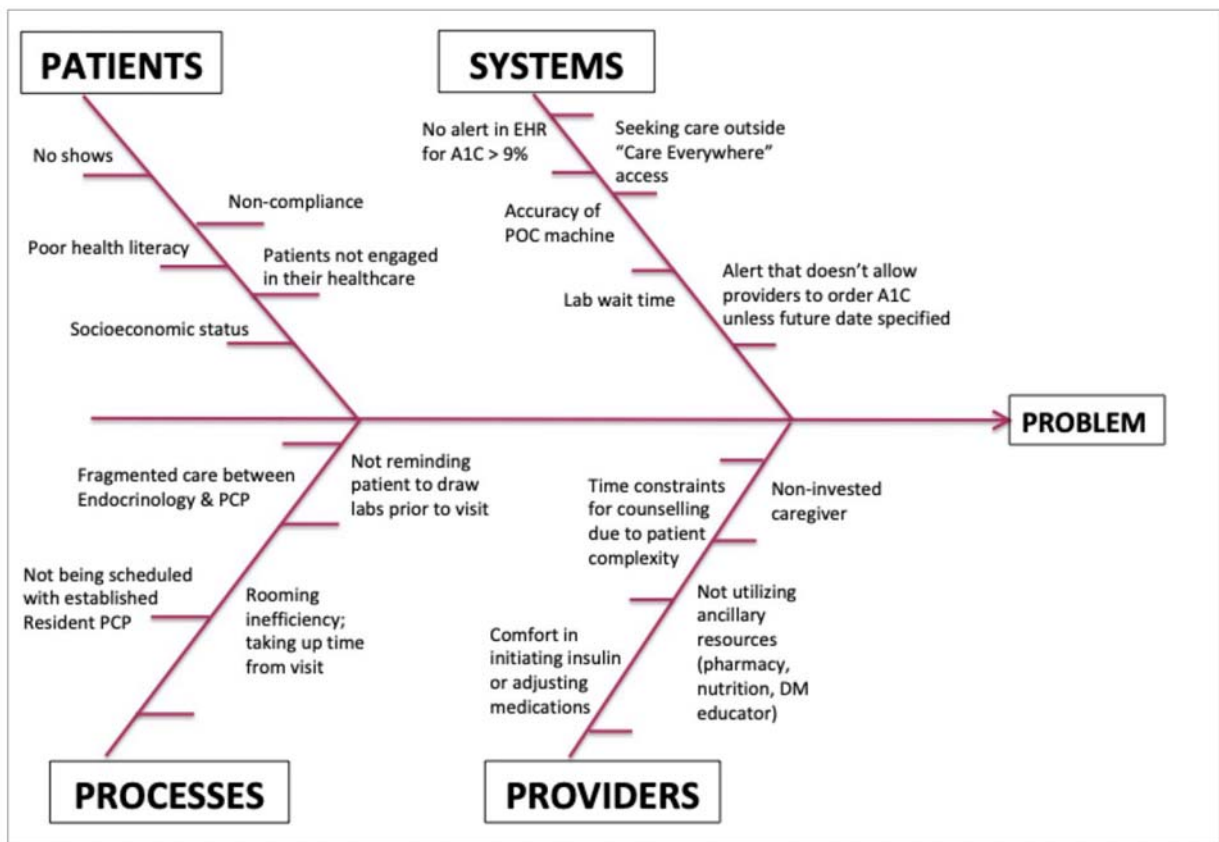

SUPPLEMENTARY DATA

Supplementary Figure 2. Decision Matrix

**PATIENTS**

| <b>Causes</b>                            | <b>Frequency<br/>(Rare 1 -<br/>Common 5)</b> | <b>Impact on<br/>Problem<br/>(Low 1 - 5 High)</b> | <b>Ease of Fixing<br/>(Difficult 1 - 5<br/>Easy)</b> | <b>Total Score<br/>(add across)</b> |
|------------------------------------------|----------------------------------------------|---------------------------------------------------|------------------------------------------------------|-------------------------------------|
| No shows                                 | 4                                            | 5                                                 | 1                                                    | 10                                  |
| Non-compliance                           | 4                                            | 5                                                 | 2                                                    | 11                                  |
| Poor health literacy                     | 4                                            | 4                                                 | 2                                                    | 10                                  |
| Patients not engaged in their healthcare | 3                                            | 4                                                 | 2                                                    | 9                                   |
| Socioeconomic status                     | 5                                            | 4                                                 | 1                                                    | 10                                  |

**SYSTEMS**

| <b>Causes</b>                                                                | <b>Frequency<br/>(Rare 1 -<br/>Common 5)</b> | <b>Impact on<br/>Problem<br/>(Low 1 - 5 High)</b> | <b>Ease of Fixing<br/>(Difficult 1 - 5<br/>Easy)</b> | <b>Total Score<br/>(add across)</b> |
|------------------------------------------------------------------------------|----------------------------------------------|---------------------------------------------------|------------------------------------------------------|-------------------------------------|
| No alert in EHR for A1C > 9%                                                 | 5                                            | 3                                                 | 4                                                    | 12                                  |
| Seeking care outside "Care Everywhere" access                                | 3                                            | 3                                                 | 2                                                    | 8                                   |
| Accuracy of POC machine                                                      | 2                                            | 4                                                 | 3                                                    | 9                                   |
| Lab wait time                                                                | 4                                            | 2                                                 | 3                                                    | 9                                   |
| Alert that doesn't allow providers to order A1C unless future date specified | 5                                            | 5                                                 | 2                                                    | 12                                  |

SUPPLEMENTARY DATA

**PROCESSES**

| <b>Causes</b>                                              | <b>Frequency<br/>(Rare 1 -<br/>Common 5)</b> | <b>Impact on<br/>Problem<br/>(Low 1 - 5 High)</b> | <b>Ease of Fixing<br/>(Difficult 1 - 5<br/>Easy)</b> | <b>Total Score<br/>(add across)</b> |
|------------------------------------------------------------|----------------------------------------------|---------------------------------------------------|------------------------------------------------------|-------------------------------------|
| Fragmented care<br>between<br>Endocrinology &<br>PCP       | 2                                            | 2                                                 | 4                                                    | 8                                   |
| Not reminding<br>patient to draw<br>labs prior to visit    | 5                                            | 4                                                 | 5                                                    | 14                                  |
| Not being<br>scheduled with<br>established<br>Resident PCP | 4                                            | 2                                                 | 5                                                    | 11                                  |
| Rooming<br>inefficiency;<br>taking up time<br>from visit   | 4                                            | 3                                                 | 5                                                    | 12                                  |

**PROVIDERS**

| <b>Causes</b>                                                                       | <b>Frequency<br/>(Rare 1 -<br/>Common 5)</b> | <b>Impact on<br/>Problem<br/>(Low 1 - 5 High)</b> | <b>Ease of Fixing<br/>(Difficult 1 - 5<br/>Easy)</b> | <b>Total Score<br/>(add across)</b> |
|-------------------------------------------------------------------------------------|----------------------------------------------|---------------------------------------------------|------------------------------------------------------|-------------------------------------|
| Time constraints<br>for counseling<br>due to patient<br>complexity                  | 4                                            | 4                                                 | 3                                                    | 11                                  |
| Non-invested<br>caregiver                                                           | 1                                            | 4                                                 | 2                                                    | 7                                   |
| Comfort in<br>initiating insulin<br>or adjusting<br>medications                     | 2                                            | 4                                                 | 4                                                    | 10                                  |
| Not utilizing<br>ancillary<br>resources<br>(pharmacy,<br>nutrition, DM<br>educator) | 2                                            | 4                                                 | 5                                                    | 11                                  |

SUPPLEMENTARY DATA

Supplementary Figure S3. Effort-Impact Matrix

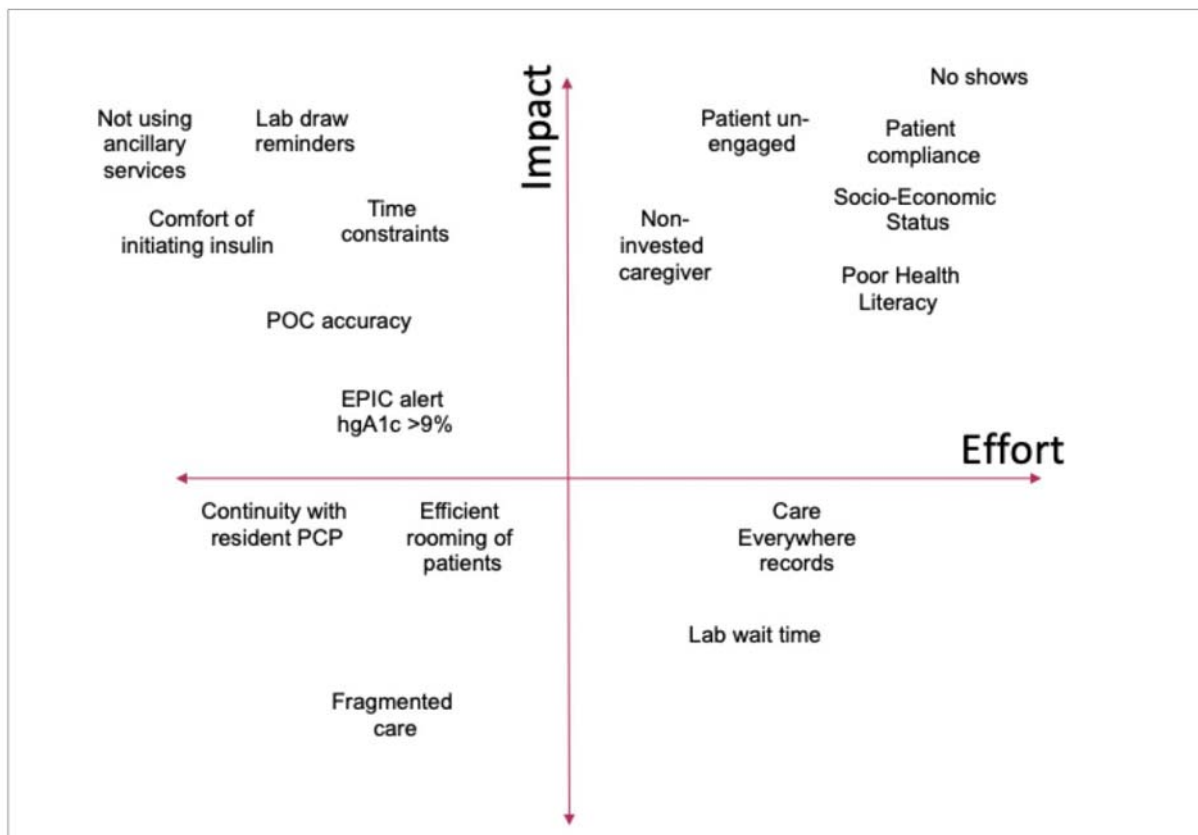

Supplement: cd190029supplementarydata.pdf [file cd190029supplementarydata.pdf]
